# Supplementary figures and images for: Human breast cancer cell lines contain stem-like cells that self-renew, give rise to phenotypically diverse progeny and survive chemotherapy
Source: Springer Nature journal article supplement (doi:10.1186/bcr1982), 2008-03-26

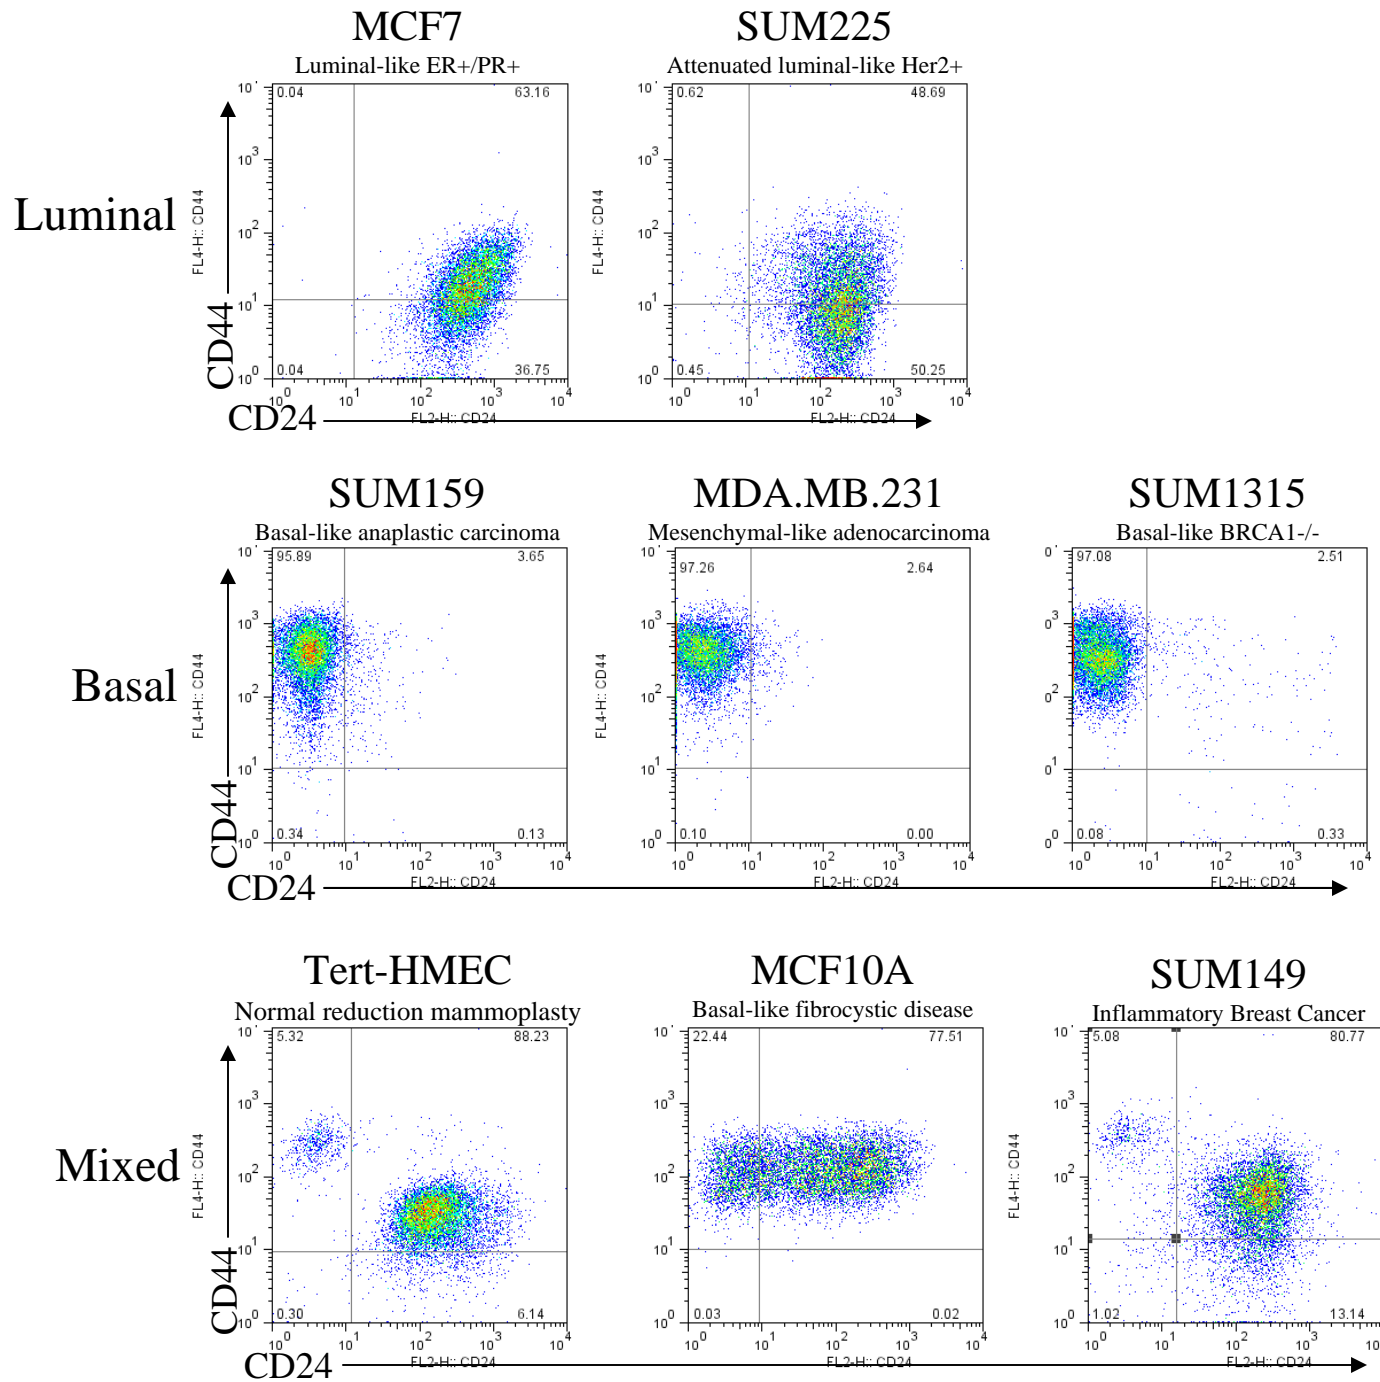

Fillmore et al. Supplemental Figure 1

Supplement: Additional file 2 [file bcr1982-s2.pdf]
